# Supplementary material
Source: Springer Nature journal article supplement (https://www.springermedizin.de/resource/supplementary/12874_2008_295_MOESM2_ESM.pdf/9434176)

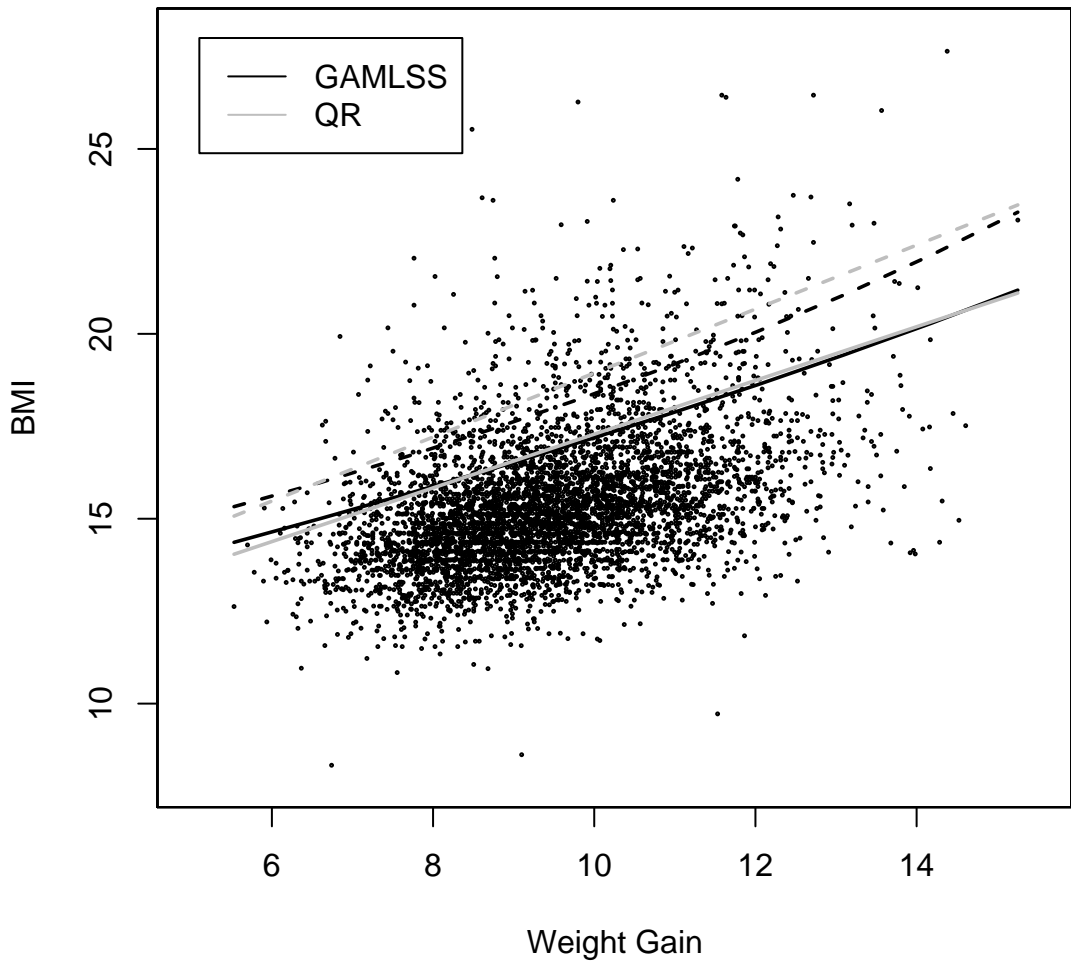

Supplement: MOESM2 [file 9434176]
